# Supplementary material
Source: PubMed Central journal article supplement (PMC3951604)

## **SUPPLEMENTAL MATERIAL**

**Supplemental Figure 1** A) Treatment of neurons with 500nM okadaic acid for 30 minutes substantially increases pSQ signal. B) Pretreatment of neurons with actinomycinD (ActD: 10  $\mu$ M) did not affect bicuculline-induced pSQ signal, treatment with TTX for 2 hours reduced pSQ signal, acute treatment with DHPG (50  $\mu$ M, 15 minutes) had no effect. C) Pretreatment of neurons with cyclohexamide (CyH: 50  $\mu$ M) did not affect bicuculline-induced pSQ signal. (D) Treatment with MG132 for 3 hours did not affect pSQ signal.

**Supplemental Table 1** Robust bidirectional phosphorylation was observed on 150 substrate proteins. Far left column indicates phosphorylation ratio of proteins in Bic:TTX treated samples as measured by immunoaffinity purification and subsequent mass spec quantification of peptide sequences. Specific phosphorylation sites are identified and accession numbers listed. Phosphorylation site with % before it indicates that the phosphorylation site has been reported in the literature.

**Supplementary Movie** 3D projection of confocal z-stack image acquisition of immunostaining of ATM in primary neuronal culture.

# Supplementary Figure 1

## Siddoway et al

**A**

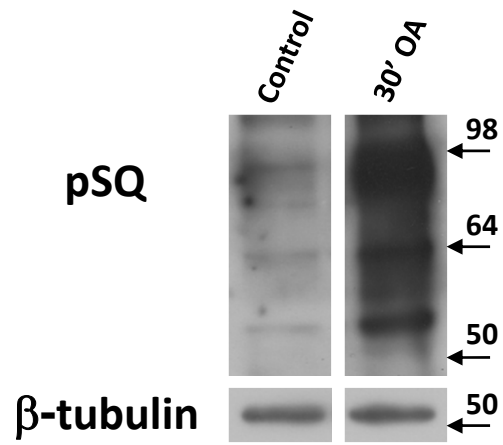

**B**

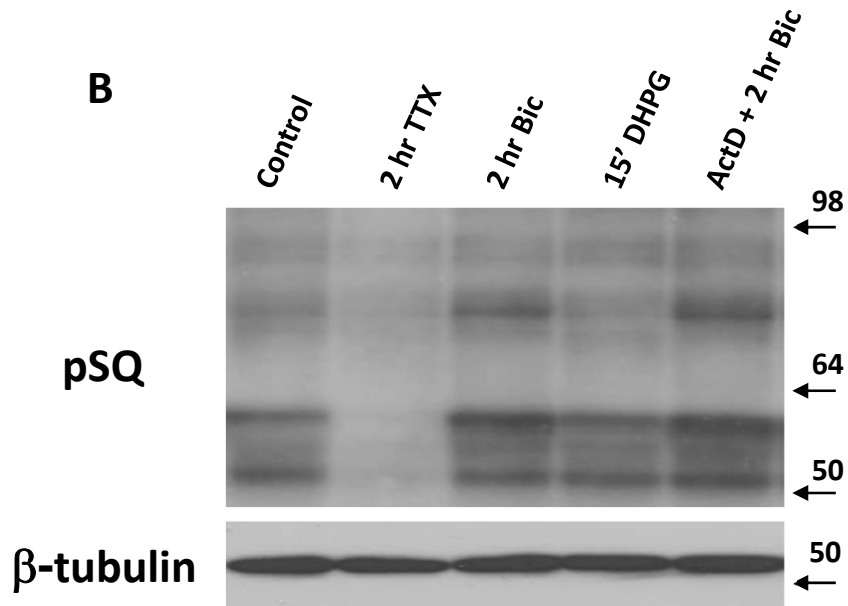

Supplementary Figure 1  
Siddoway et al

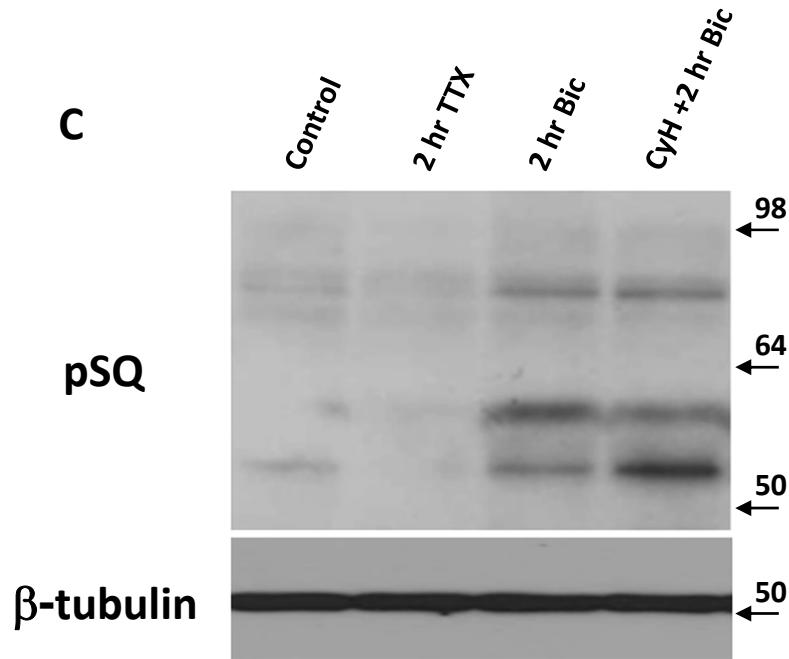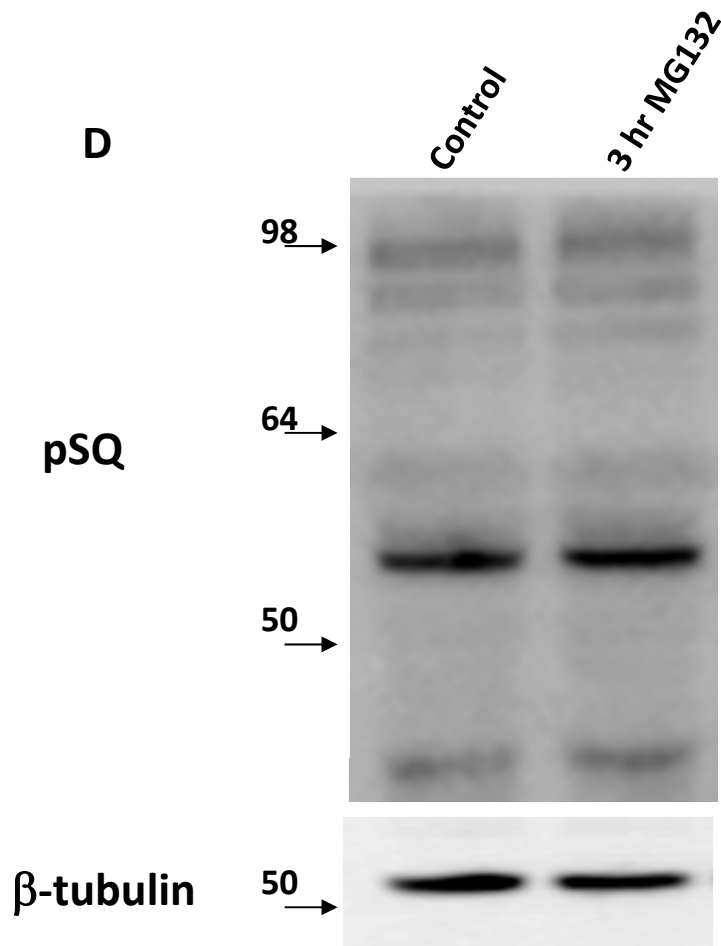

Supplement: NIHMS532838-supplement-Supp_Figure_S1.pdf [file NIHMS532838-supplement-Supp_Figure_S1.pdf]
